# Supplementary material for: Copper-induced concomitant increases in photosynthesis, respiration, and C, N and S assimilation revealed by transcriptomic analyses in Ulva compressa (Chlorophyta)
Source: PubMed Central journal article supplement (PMC6964094; doi:10.1186/s12870-019-2229-5), 2020-01-15
Supplement: 12870_2019_2229_MOESM1_ESM.pdf [file 12870_2019_2229_MOESM1_ESM.pdf]

**Supplementary Table 1.** Sequencing, pre-processing of reads and assembly of *Ulva compressa* transcriptomes.

| Libraries                         | Total Raw Reads | Reads after QC and Decontamination |
|-----------------------------------|-----------------|------------------------------------|
| AA05910 (0 h-1)                   | 100,260,000     | 98,680,000                         |
| AA06575 (0 h-2)                   | 100,260,000     | 98,660,000                         |
| AA06071 (24 h-1)                  | 96,590,000      | 95,100,000                         |
| TT1_23 (24 h-2)                   | 97,790,000      | 94,740,000                         |
| AA06107 (72 h-1)                  | 94,770,000      | 93,490,000                         |
| AA06459 (72 h-2)                  | 100,280,000     | 98,960,000                         |
| AA05880 (120 h-1)                 | 100,280,000     | 98,880,000                         |
| AA06305 (120 h-2)                 | 95,270,000      | 94,110,000                         |
| <b>Transcriptome assembly</b>     |                 |                                    |
| Total transcripts                 | 140,84          |                                    |
| Total bases                       | 221,850,501     |                                    |
| Min sequence length               | 300             |                                    |
| Max sequence length               | 5,14            |                                    |
| Average sequence length           | 1,575           |                                    |
| N50 length                        | 3,093           |                                    |
| N75 length                        | 1,953           |                                    |
| N90 length                        | 662             |                                    |
| N95 length                        |                 |                                    |
| (G + C)                           | 56.30           |                                    |
| N                                 | 0%              |                                    |
| <b>Transcriptome completeness</b> |                 |                                    |
| Completeness                      | 93.4%           |                                    |
| Complete CEG                      | 283             |                                    |
| Complete and single copy          | 30              |                                    |
| Complete and multi-copy           | 253             |                                    |
| Fragmented CEGs                   | 9               |                                    |
| Missing CEGs                      | 11              |                                    |
| Total CEGs database               | 303             |                                    |
